# Supplementary material
Source: publisher site journal article supplement (https://www.dovepress.com/article/498740)
Supplement: Supplementary file 1 [file get_supplementary_file.php]

**Supporting information**

**
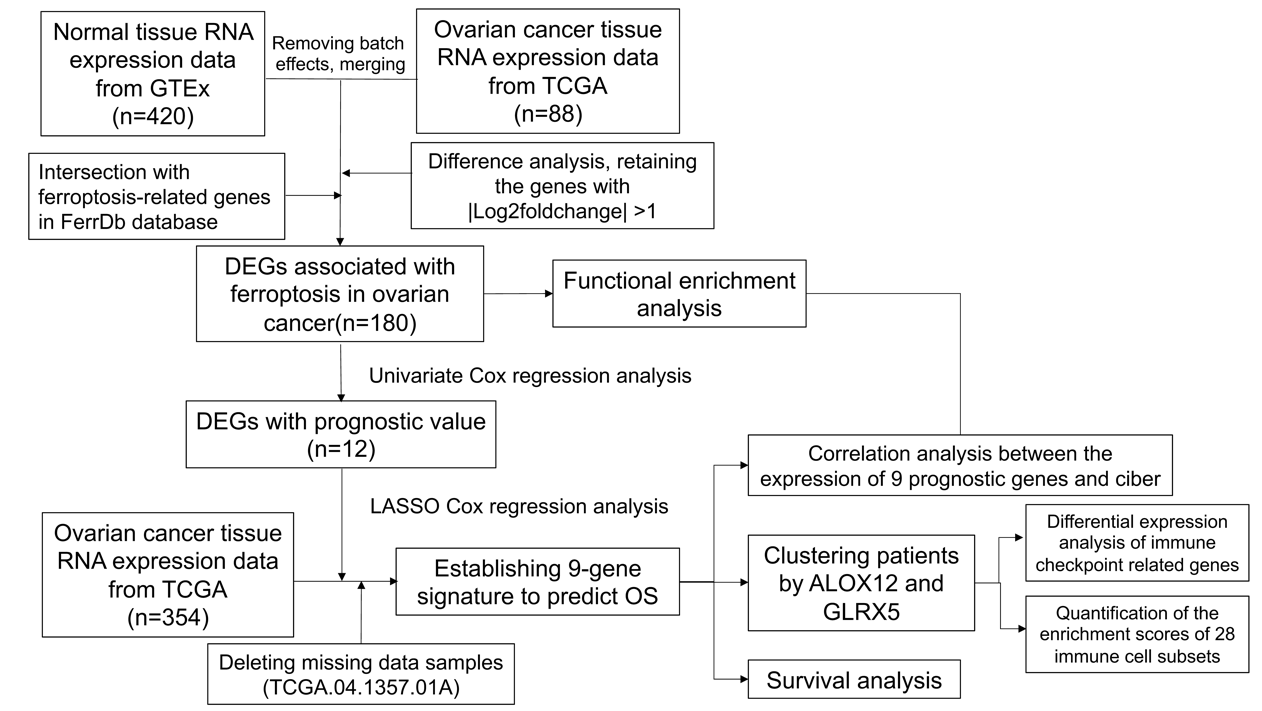
**

**Supplementary Figure S1.** The flowchart of our study.

**
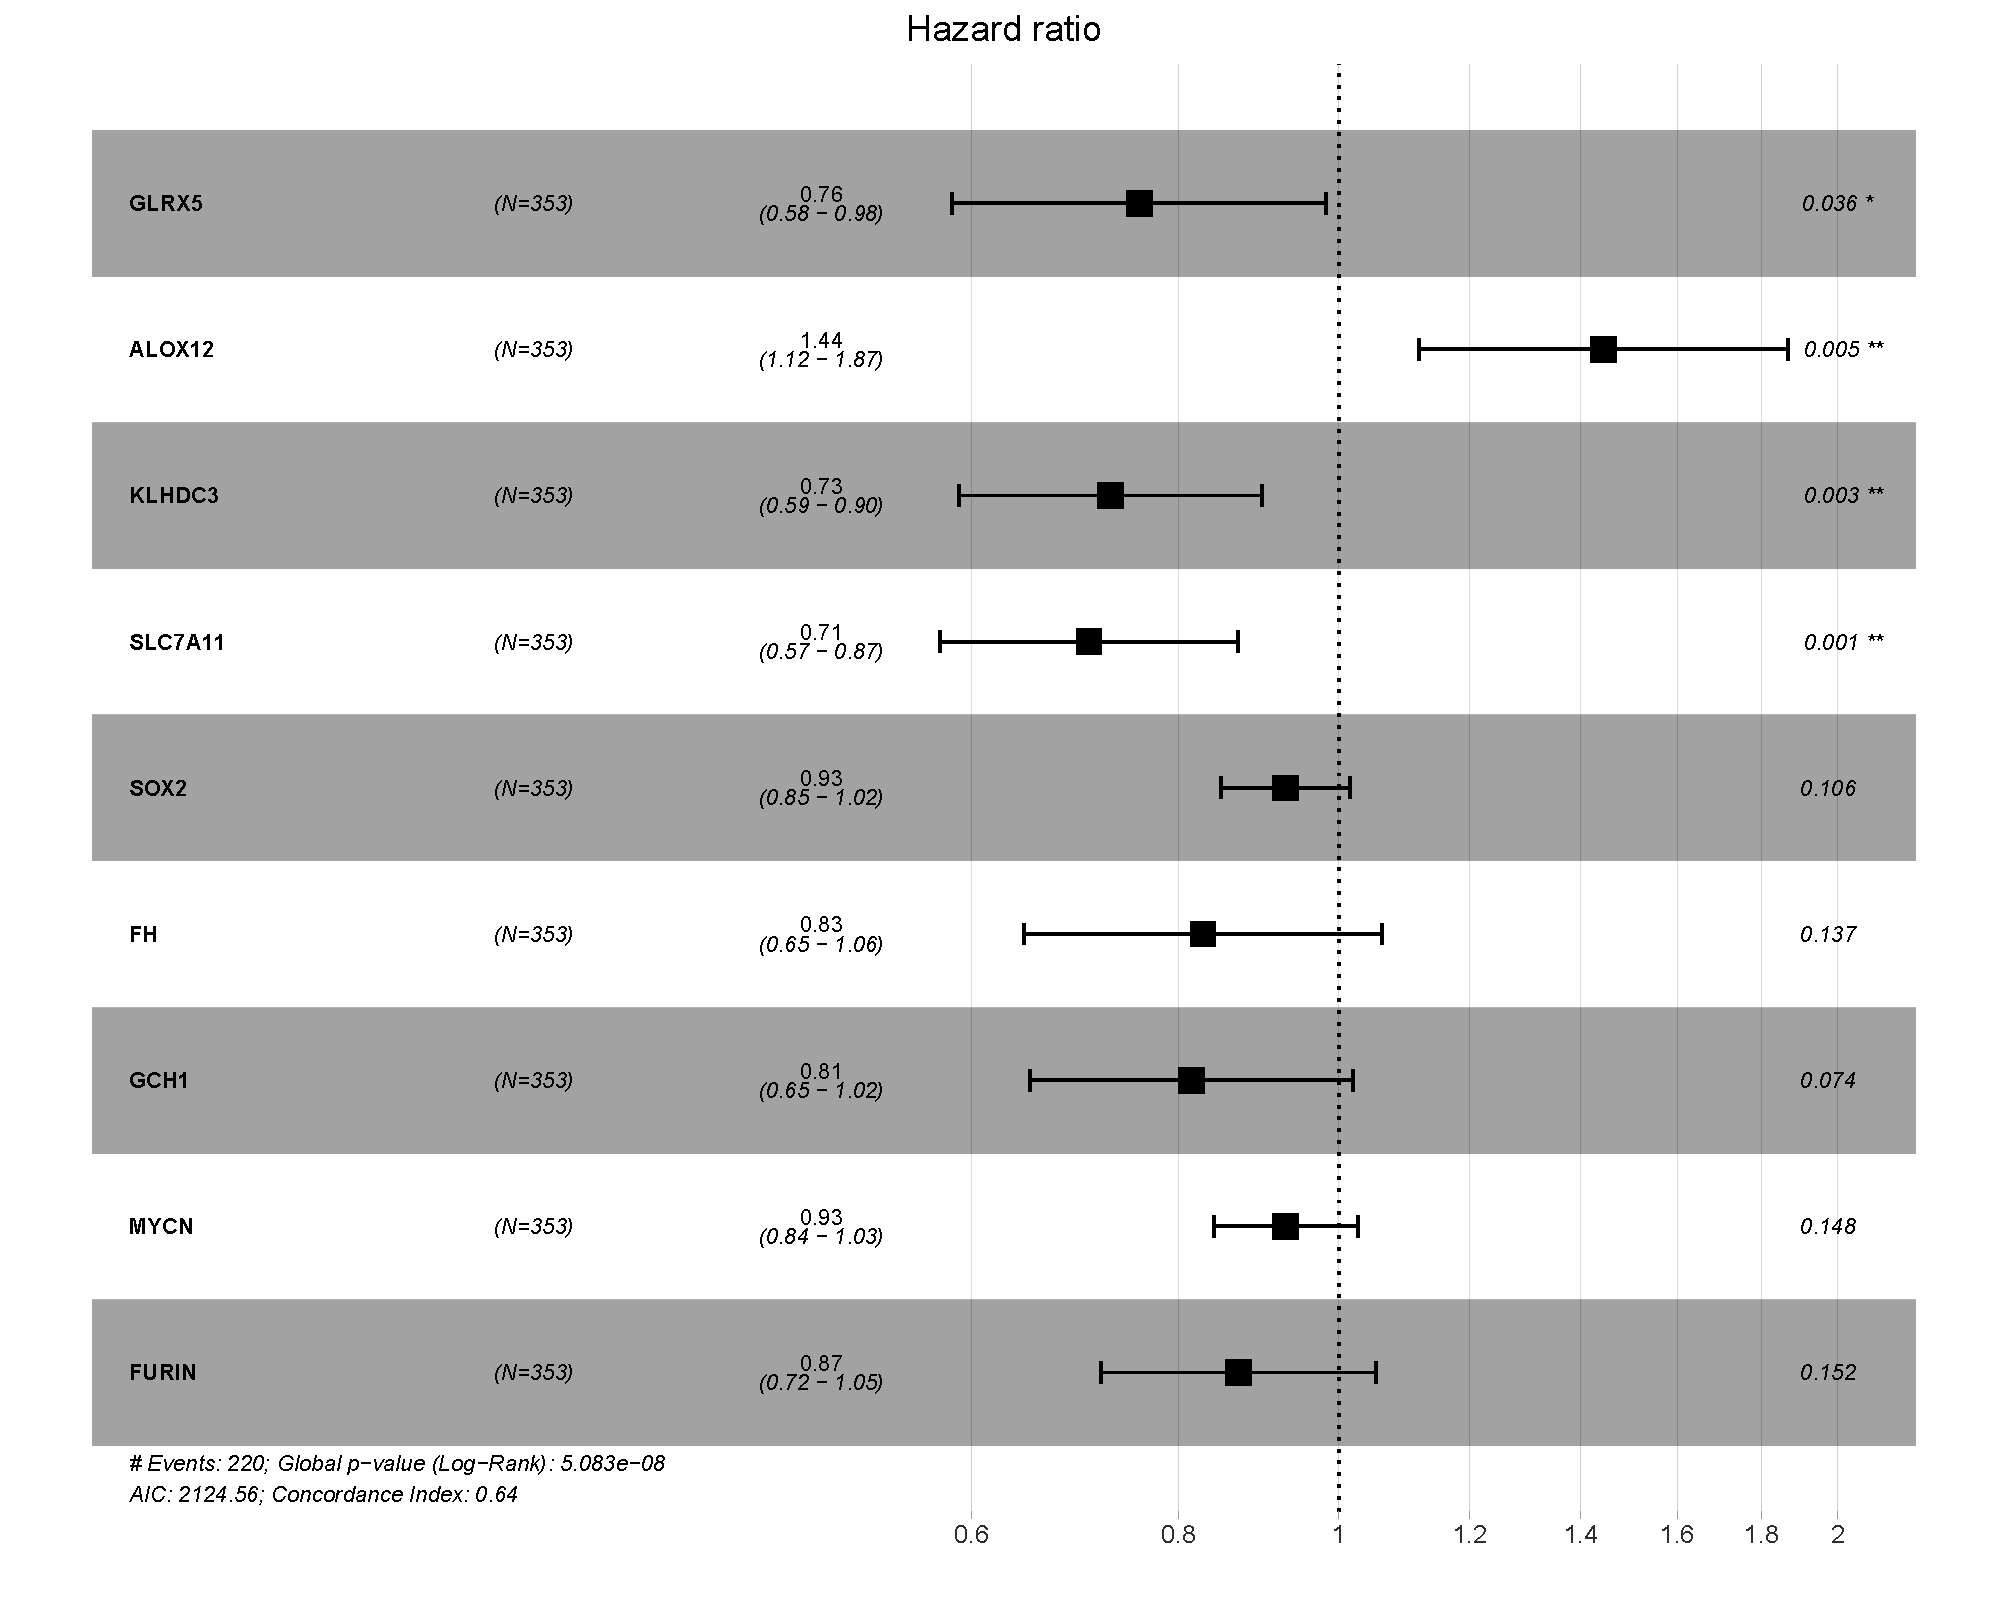
**

**Supplementary Figure S2.** The multivariate regression analysis forest plot showed a strong relationship between 9 prognostic ferroptosis-related genes and overall survival. * indicates P value < 0.05, ** indicates P value < 0.01.

**Supplementary Table S1.** Ferroptosis-related differentially expressed genes in ovarian cancer. Among all genes in the table, VDAC2 and IL6 can both drive and suppress the ferroptosis, so VDAC2 and IL6 belong to the driver column and also to the suppressor column.

| Driver | Suppressor | Marker |
| --- | --- | --- |
| PTPN6 | MUC1 | CHAC1 |
| AQP5 | RRM2 | GPX4 |
| CDKN2A | ETV4 | FTH1 |
| CIRBP | CDH1 | HSPB1 |
| MYB | KIF20A | TF |
| NRAS | PDK4 | TFRC |
| IDO1 | CP |  |
| CFL1 | LCN2 |  |
| YTHDC2 | IDH2 |  |
| AMN | GALNT14 |  |
| ATM | TFAP2A |  |
| TSC1 | MT1G |  |
| BID | HCAR1 |  |
| GABARAPL1 | PROM2 |  |
| GRIA3 | NR4A1 |  |
| CCDC6 | ARF6 |  |
| SLC38A1 | VDR |  |
| NR1D1 | OTUB1 |  |
| KLF2 | CA9 |  |
| TRIM46 | TYRO3 |  |
| CHAC1 | MGST1 |  |
| MAP3K11 | ARNTL |  |
| DDR2 | NQO1 |  |
| LPIN1 | CISD2 |  |
| CTSB | PARP1 |  |
| TFR2 | TERT |  |
| MIB2 | EZH2 |  |
| IL1B | CDC25A |  |
| TRIM26 | CDKN1A |  |
| CPEB1 | COPZ1 |  |
| CYBB | FNDC5 |  |
| DCAF7 | PRDX6 |  |
| CD82 | AKR1C1 |  |
| MDM4 | SUV39H1 |  |
| FBXW7 | MEF2C |  |
| LIFR | PARP12 |  |
| MYCN | TXN |  |
| CDCA3 | TFAM |  |
| CDO1 | RICTOR |  |
| TNFAIP3 | PARP9 |  |
| KEAP1 | TRIB2 |  |
| ACVR1B | PARP6 |  |
| ATG3 | GLRX5 |  |
| PPARG | ABHD12 |  |
| MMD | GPX4 |  |
| ULK2 | SESN2 |  |
| NCOA4 | PLA2G6 |  |
| ALOX5 | SLC7A11 |  |
| ULK1 | VDAC2 |  |
| ALOXE3 | ADAMTS13 |  |
| PEX10 | FTH1 |  |
| SLC7A11 | NEDD4L |  |
| VDAC2 | FANCD2 |  |
| LPCAT3 | AKT1S1 |  |
| GSK3B | HELLS |  |
| FOXO4 | NT5DC2 |  |
| TTPA | FH |  |
| NOX4 | PRDX1 |  |
| SLC11A2 | PTPN18 |  |
| SNCA | PML |  |
| PGD | MLST8 |  |
| ZEB1 | HMOX1 |  |
| SLC25A28 | KLHDC3 |  |
| ALOX12B | CISD1 |  |
| GSTZ1 | SLC16A1 |  |
| HMOX1 | TP53 |  |
| HDDC3 | FURIN |  |
| PEX2 | GDF15 |  |
| TP53 | P4HB |  |
| KDM6B | PROK2 |  |
| ACADSB | CAV1 |  |
| LGMN | AKR1C2 |  |
| MIB1 | HSPB1 |  |
| MIOX | HSF1 |  |
| KRAS | SOX2 |  |
| CYGB | FTL |  |
| ADAM23 | TP63 |  |
| PRKCA | ECH1 |  |
| EPAS1 | PARP14 |  |
| IFNG | MS4A15 |  |
| TF | GCH1 |  |
| FADS1 | RARRES2 |  |
| NOX1 | NEDD4 |  |
| ALOX12 | NOS2 |  |
| TFRC | TF |  |
| EGR1 | FGF21 |  |
| CYP4F8 | CD44 |  |
| IL6 | ZFP36 |  |
| FLT3 | TFRC |  |
| ALOX15 | IL6 |  |
| IFNA13 | ADIPOQ |  |
| IFNA6 | GSTM1 |  |
| LCE2C |  |  |
| IFNA5 |  |  |
| IFNA21 |  |  |
